# Supplementary material for: Review of Wing Morphology in Fossil and Modern Species of Humpbacked Flies (Diptera: Phoridae)
Source: Research Square preprint supplement (doi:10.21203/rs.3.rs-5923884/v1), 2025-02-04
Supplement: Supplementary file 1 [file c030b73adb76478bf7a1901b.pdf]

# **Review of Wing Morphology in Fossil and Modern Species of Humpbacked Flies (Diptera: Phoridae)**

Mélanie C.M. Herbert<sup>1\*</sup>, André Nel<sup>2</sup>, Brian V. Brown<sup>3</sup>, Antonio Arillo<sup>4</sup>, Brendon E.  
Boudinot<sup>5</sup>, Mónica M. Solórzano-Kraemer<sup>1</sup>

<sup>1</sup>*Paläontologie und Historische Geologie, Senckenberg Forschungsinstitut und Naturmuseum,  
Senckenberganlage 25, D-60325 Frankfurt-am-Main, Germany.*

<sup>2</sup>*Institut Systématique Evolution Biodiversité (ISYEB), Muséum national d'Histoire naturelle,  
CNRS, Sorbonne Université, EPHE, Université des Antilles, Paris, France.*

<sup>3</sup>*Department of Entomology, Natural History Museum of Los Angeles County, 900 Exposition  
Blvd, Los Angeles, CA, 90007, USA.*

<sup>4</sup>*Departamento de Biodiversidad, Ecología y Evolución, Facultad de Biología, Universidad  
Complutense, Madrid, Spain.*

<sup>5</sup>*Entomology II, Abteilung Terrestrische Zoologie, Senckenberg Forschungsinstitut und  
Naturmuseum, Senckenberganlage 25, D-60325 Frankfurt-am-Main, Germany.*

*\*Correspondence to be sent to: Paläontologie und Historische Geologie, Senckenberg  
Forschungsinstitut und Naturmuseum, Senckenberganlage 25, D-60325 Frankfurt-am-Main,  
Germany. E-mail address: [melanie.herbert@senckenberg.de](mailto:melanie.herbert@senckenberg.de)*

## ADDITIONAL FILE 2 – FIGURES S2

### Complementary Figures of Phoridae

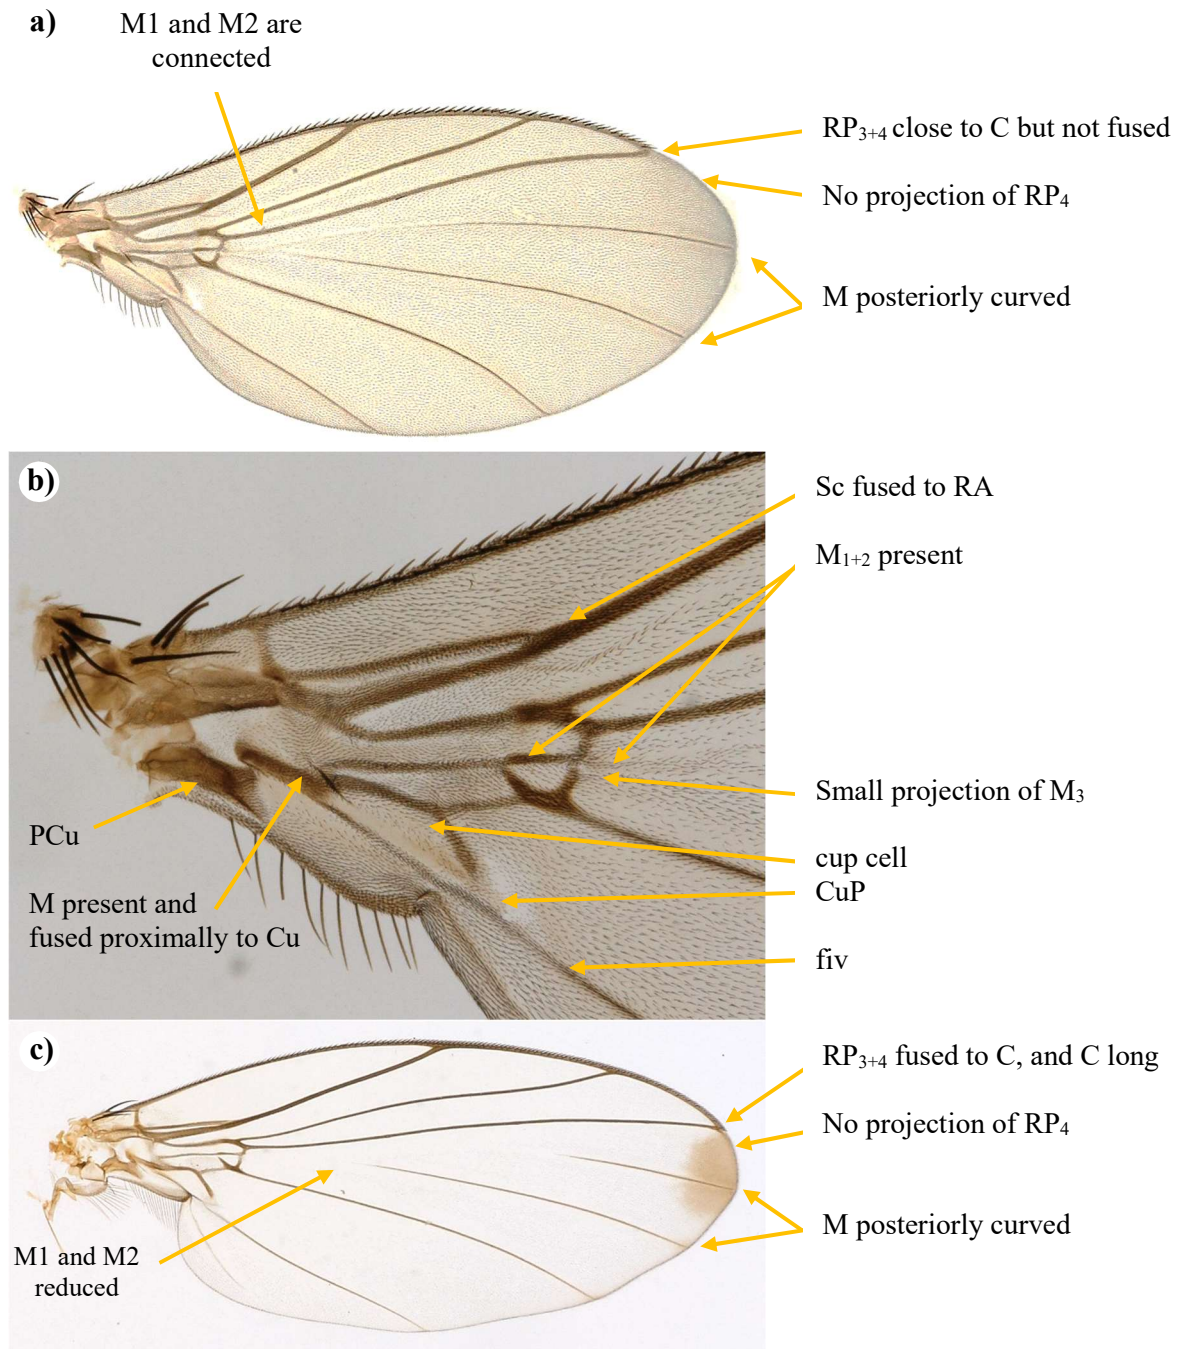

Figure S2.1. **Photographs of wings of living specimens with a early model.** *Archisciada* sp., LACM no number: a, full wing; b, zoom of basal part; c, *Sciadocera* sp., male, LACM no number

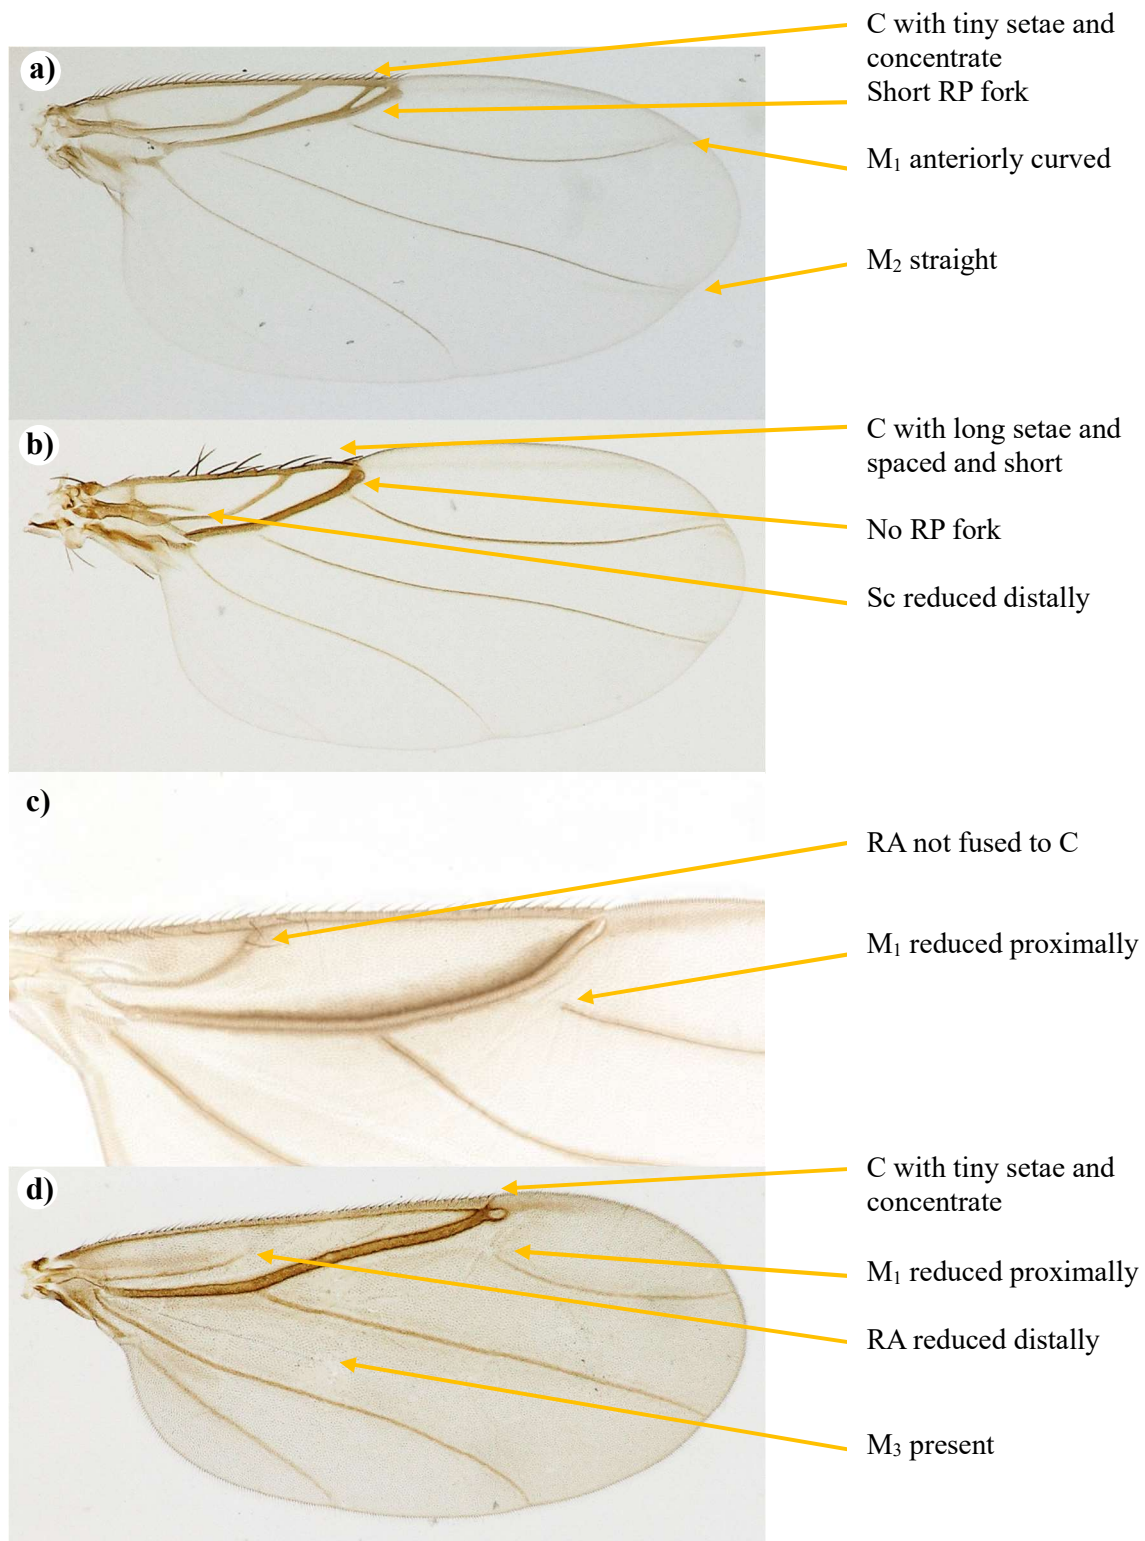

Figure S2.2. **Photographs of wings of Living specimens with a recent model.** a, *Dohrniphora* sp., LACM No number; b, *Conicera* sp., LACM No number; c, *Metopina* sp., LACM No number; d, *Chronocephalus* sp., LACM No number.

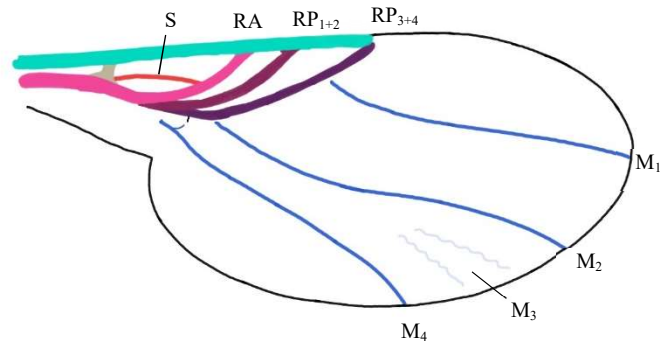

Figure S2.3. †*Agaphora iunior* Mostovski, 1999. Drawing based on figure 7 in Mostovski (1999)



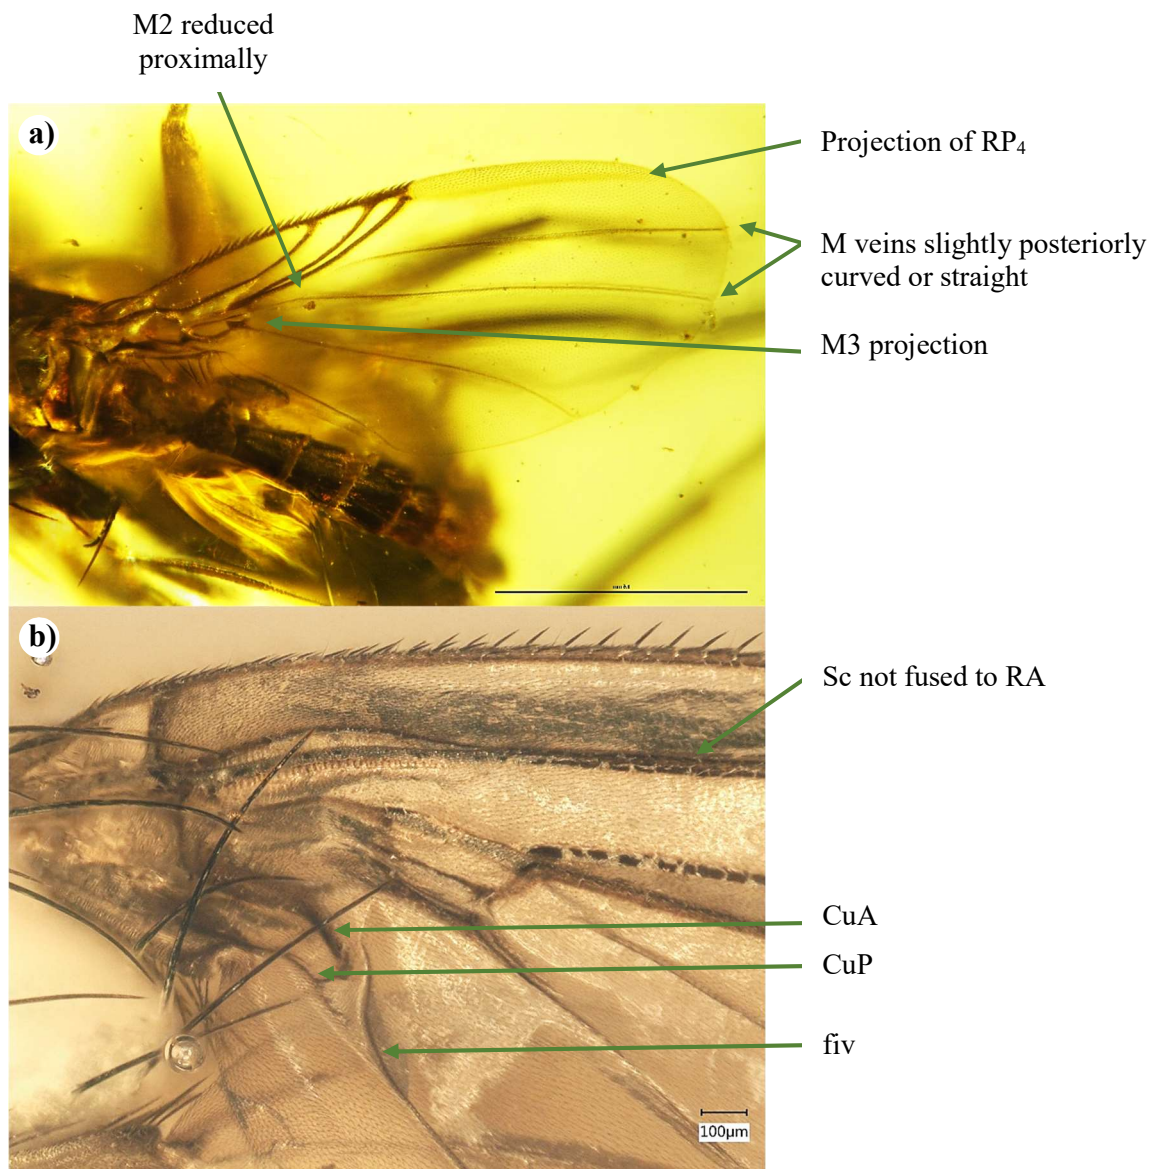

Figure S2.4. **Photographs of wings of fossil specimens with a early model.** a, †*Prioriphora* sp. SMF-Be 2381.2 in Burmese amber; b, potentiel †*Ulrichophora* sp. CCHH 4804-3 (LACM) in Baltic amber.

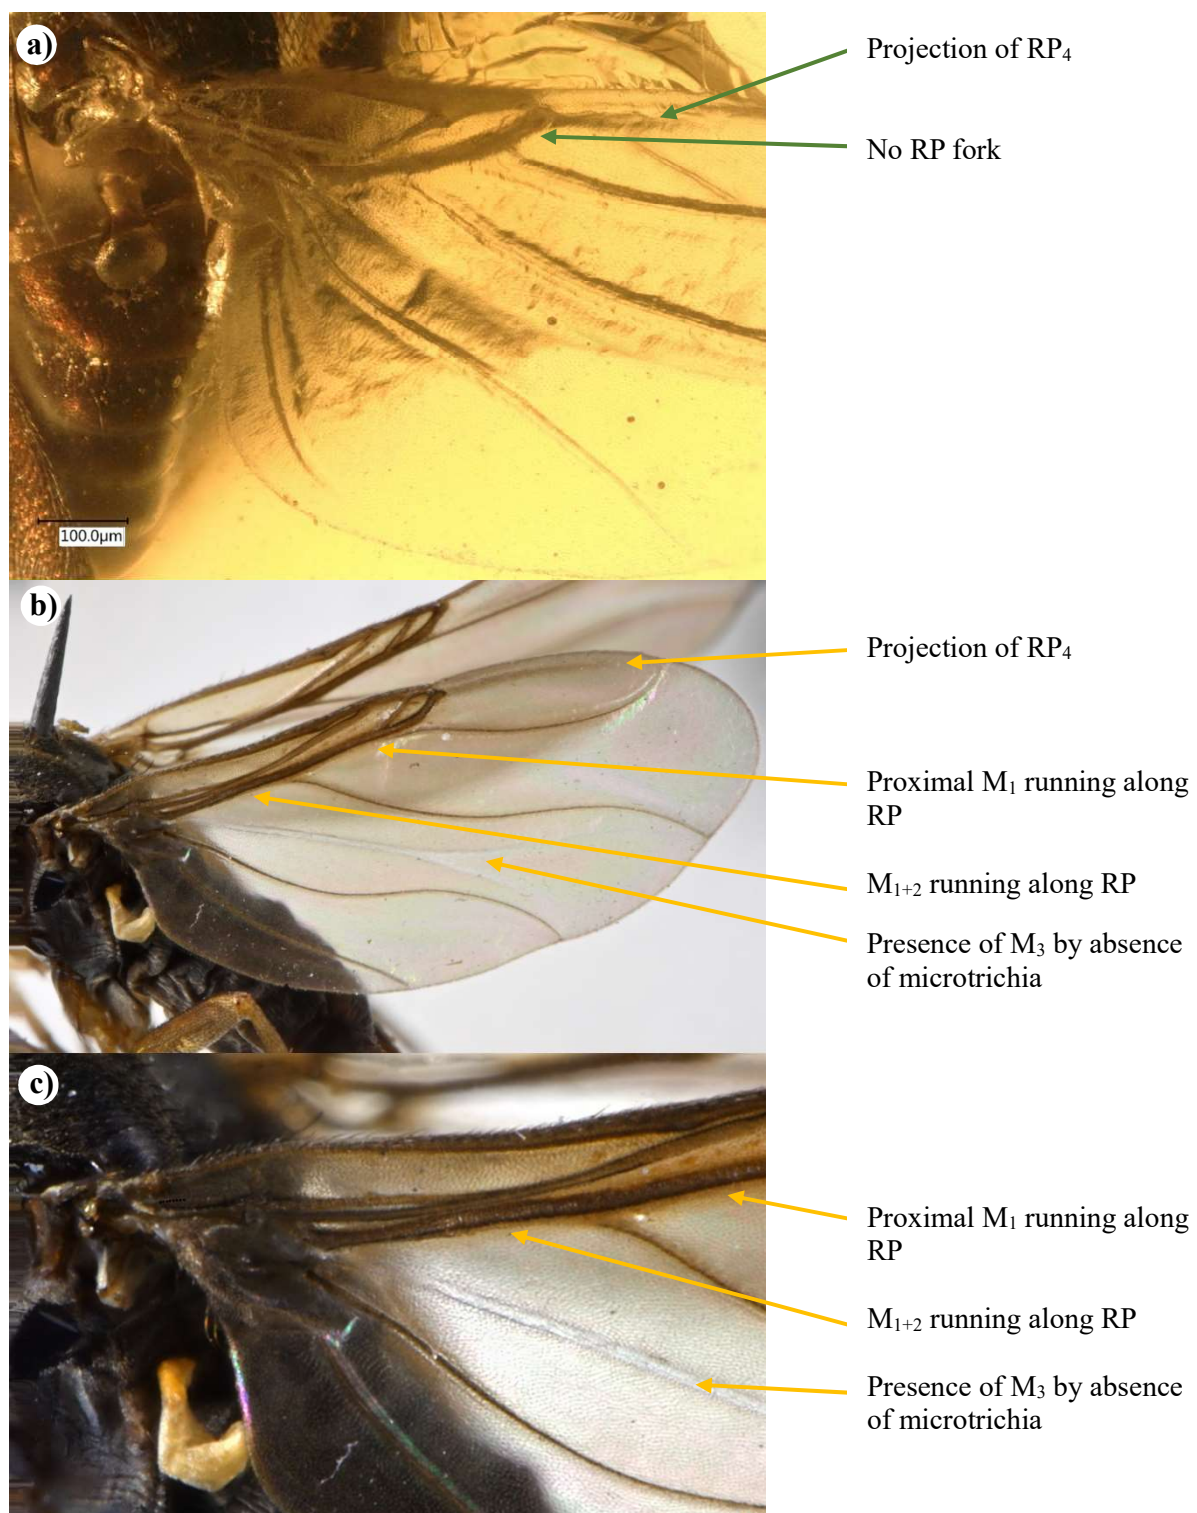

Figure S2.5. **Photographs of wings of fossil and extant specimens with a recent model.** a, *Potentiel †Aenigmatias* sp. CCHH 1804-1 (LACM), in Baltic amber; b and c, *Gymnophora* sp., MNHN no number, living species, full wing and zoom of proximal part, respectfully.

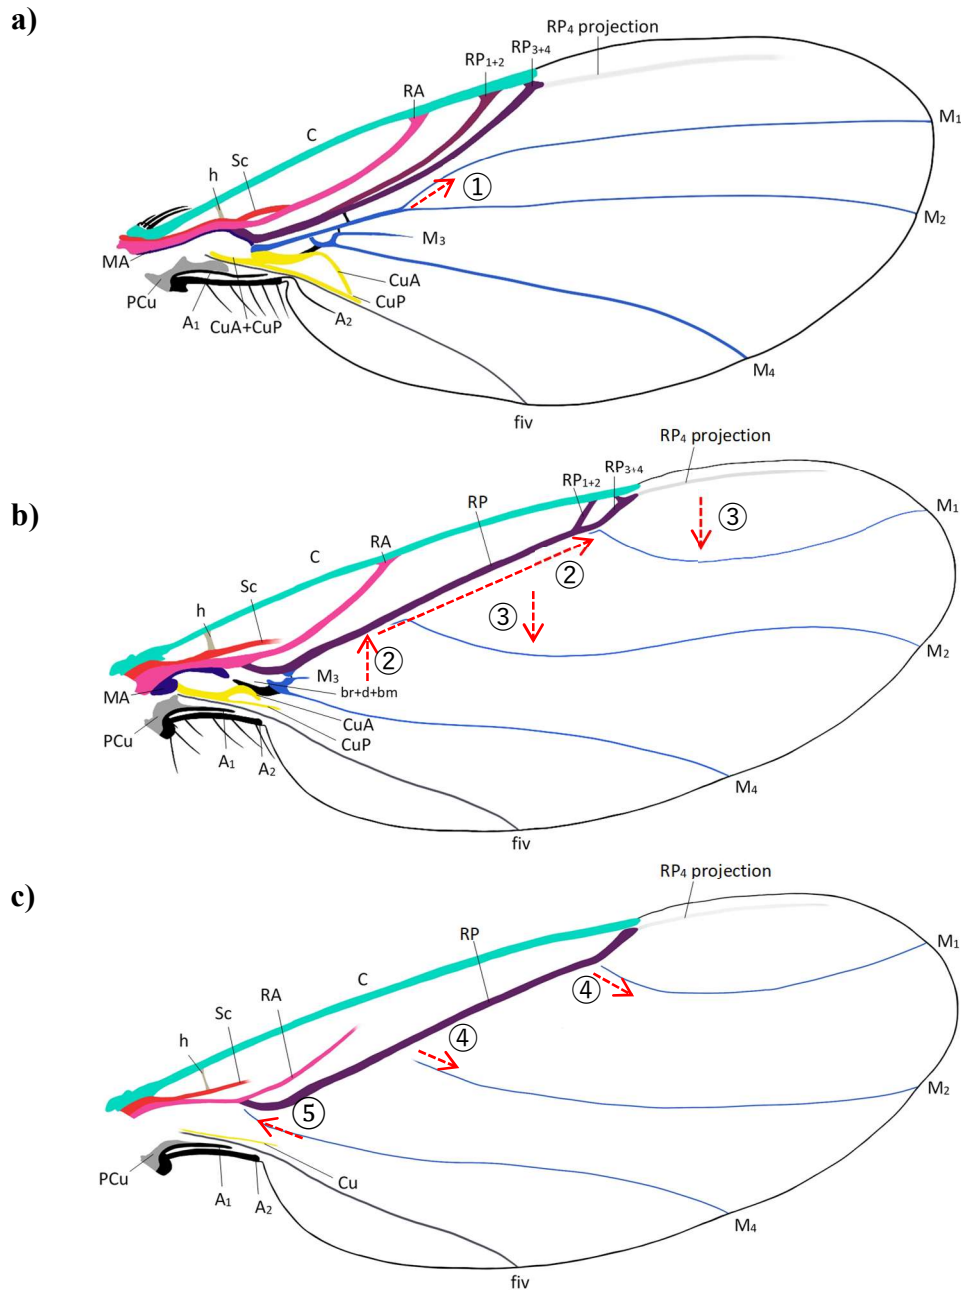

Figure S2.6. **Hypothesis of reduction of Phoridae medial veins.** a, Early wing, M<sub>1</sub> and M<sub>2</sub> are clearly separate from RP, and M<sub>1</sub> is connected to M<sub>2</sub> or reduced proximally ①, and all three proximal cells are present; b, Recent wing, RP fork reduced ②, M<sub>1</sub> and M<sub>2</sub> migrated to the posterior radial system without fused to RP veins ②. Opening of the proximal cells and a change in their orientation from posteriorly curved to sigmoidal ③; c, Wing with an “extreme”

reduction of venation, proximal reduction of  $M_1$  and  $M_2$  ④,  $M_4$  extending proximally ⑤,  
disappearance of the



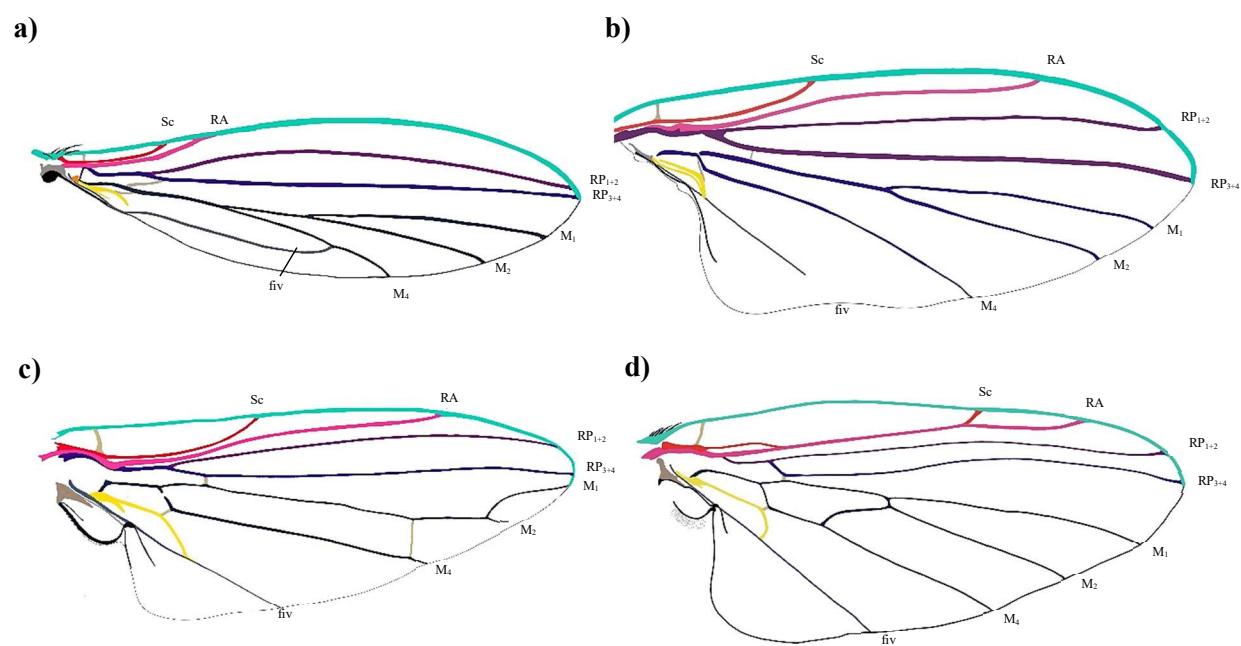

Figure S2.7. **Wing patterns.** a) Lonchopteridae, b) Opetiidae, c) Platypetizidae, d) Ironomyiidae.
